# Supplementary figures and images for: Initial structure of cetyltrimethylammonium bromide micelles in aqueous solution from molecular dynamics simulations
Source: Royal Society of Chemistry journal article supplement (doi:10.1039/c1sm05127j), 2011-01-01

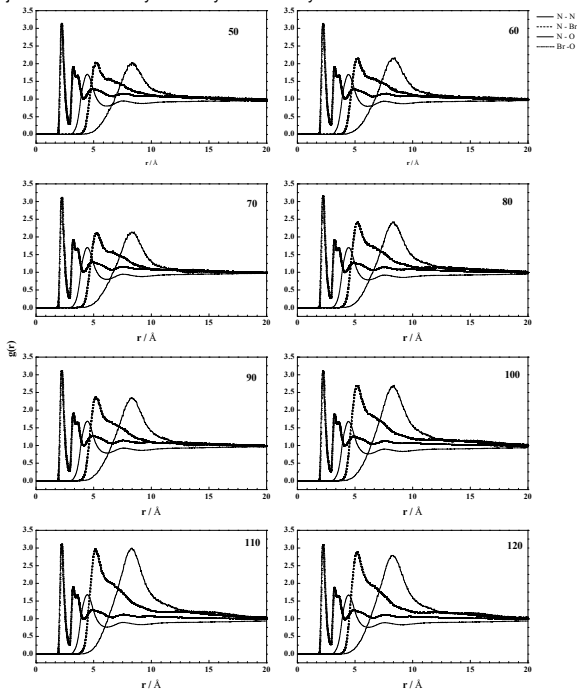

Supplement: c1sm05127j.pdf [file c1sm05127j.pdf]
